# Supplementary material for: Improved tolerance to drought stress after anthesis due to priming before anthesis in wheat (Triticum aestivum L.) var. Vinjett
Source: PubMed Central journal article supplement (PMC4246180; doi:10.1093/jxb/eru362), 2014-09-09
Supplement: supp_eru362_jexbot108241_file001.pdf [file supp_eru362_jexbot108241_file001.pdf]

**Supplementary Figures for ms JEXBOT/2013/108241**

Title:

Improved tolerance to drought stress after anthesis due to priming before anthesis in wheat (*Triticum aestivum* L.) var. Vinjett

Authors:

Xiao Wang, Marija Vigjevic, Dong Jiang, Susanne Jacobsen, Bernd Wollenweber

### **Supplementary Figure Legend**

Supplemental Fig.1 The correlation of ABA and APX (A), ABA and gs (B) under drought priming during the vegetative growth stages. r is the correlation coefficient. \* indicate statistically significant differences ( $P < 0.05$ ).

Supplemental Fig.2 The correlation of ABA and APX (A), ABA and gs (B) under drought stress during grain filling. r is the correlation coefficient. \* indicate statistically significant differences ( $P < 0.05$ ).

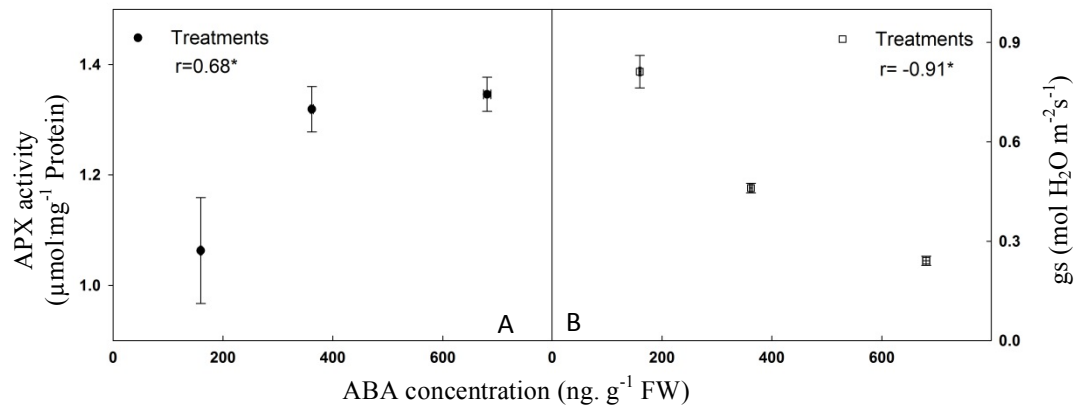

**Supplementary Figure 1**

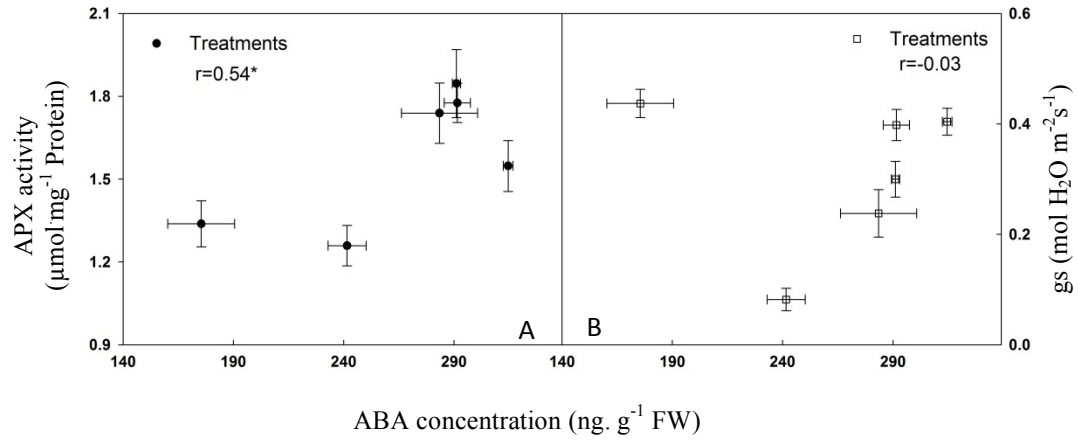

**Supplementary Figure 2**
